# Supplementary material for: Detection of Winter Heat Wave Impact on Surface Runoff in a Periglacial Environment (Ny-Ålesund, Svalbard)
Source: MDPI journal article supplement (doi:10.3390/rs15184435), 2023-09-09
Supplement: s1 [file s1]

Archive with 1 entries (1 files):
- remotesensing-2507913-supplementary.pdf
