# Supplementary material for: Detection of Winter Heat Wave Impact on Surface Runoff in a Periglacial Environment (Ny-Ålesund, Svalbard)
Source: MDPI journal article supplement (doi:10.3390/rs15184435), 2023-09-09
Supplement: s1 [file s1 › remotesensing-2507913-supplementary.pdf]

**Table S1a.** Confusion Matrix of image classification obtained by Sentinel-2 image acquired on 2022/03/18.

| <b>Class</b>   | <b>Snow</b> | <b>Shadow on Snow</b> | <b>Freshwater</b> | <b>Total</b> |
|----------------|-------------|-----------------------|-------------------|--------------|
| Unclassified   | 0.00        | 0.00                  | 0.00              | 0.00         |
| Snow           | 100.00      | 0.00                  | 0.48              | 37.88        |
| Shadow on Snow | 0.00        | 100.00                | 0.00              | 50.92        |
| Freshwater     | 0.00        | 0.00                  | 99.52             | 11.20        |
| Total          | 100.00      | 100.00                | 100.00            | 100.00       |

**Table S1b.** Classification errors of image classification obtained by Sentinel-2 image acquired on 2022/03/18.

| <b>Class</b>   | <b>Commission (%)</b> | <b>Omission (%)</b> |
|----------------|-----------------------|---------------------|
| Snow           | 0.14                  | 0.00                |
| Shadow on Snow | 0.00                  | 0.00                |
| Freshwater     | 0.00                  | 0.48                |

**Table S1c.** Classification accuracy of image classification obtained by Sentinel-2 image acquired on 2022/03/18.

| <b>Class</b>   | <b>Producer Acc. (%)</b> | <b>User Acc. (%)</b> |
|----------------|--------------------------|----------------------|
| Snow           | 100.00                   | 98.86                |
| Shadow on Snow | 100.00                   | 100.00               |
| Freshwater     | 99.52                    | 100.00               |

**Table S2a.** Confusion Matrix of image classification obtained by Sentinel-2 image acquired on 2022/03/26.

| <b>Class</b>   | <b>Snow</b> | <b>Shadow on Snow</b> | <b>Freshwater</b> | <b>Total</b> |
|----------------|-------------|-----------------------|-------------------|--------------|
| Unclassified   | 0.00        | 0.00                  | 3.47              | 0.68         |
| Snow           | 100.00      | 0.00                  | 0.39              | 29.79        |
| Shadow on Snow | 0.00        | 100.00                | 0.00              | 50.61        |
| Freshwater     | 0.00        | 0.00                  | 96.14             | 18.92        |
| Total          | 100.00      | 100.00                | 100.00            | 100.00       |

**Table S2b.** Classification errors of image classification obtained by Sentinel-2 image acquired on 2022/03/26.

| <b>Class</b>   | <b>Commission (%)</b> | <b>Omission (%)</b> |
|----------------|-----------------------|---------------------|
| Snow           | 0.26                  | 0.00                |
| Shadow on Snow | 0.00                  | 0.00                |
| Freshwater     | 0.00                  | 3.86                |

**Table S2c.** Classification accuracy of image classification obtained by Sentinel-2 image acquired on 2022/03/26.

| <b>Class</b>   | <b>Producer Acc. (%)</b> | <b>User Acc. (%)</b> |
|----------------|--------------------------|----------------------|
| Snow           | 100.00                   | 99.74                |
| Shadow on Snow | 100.00                   | 100.00               |
| Freshwater     | 96.14                    | 100.00               |

**Table S3a.** Confusion Matrix of image classification obtained by Sentinel-2 image acquired on 2022/03/30.

| <b>Class</b>   | <b>Snow</b> | <b>Shadow on Snow</b> | <b>Freshwater</b> | <b>Total</b> |
|----------------|-------------|-----------------------|-------------------|--------------|
| Unclassified   | 0.00        | 0.00                  | 10.16             | 1.63         |
| Snow           | 100.00      | 0.00                  | 0.53              | 39.81        |
| Shadow on Snow | 0.00        | 100.00                | 0.00              | 44.26        |
| Freshwater     | 0.00        | 0.00                  | 89.30             | 14.30        |
| Total          | 100.00      | 100.00                | 100.00            | 100.00       |

**Table S3b.** Classification errors of image classification obtained by Sentinel-2 image acquired on 2022/03/30.

| <b>Class</b>   | <b>Commission (%)</b> | <b>Omission (%)</b> |
|----------------|-----------------------|---------------------|
| Snow           | 0.22                  | 0.00                |
| Shadow on Snow | 0.00                  | 0.00                |
| Freshwater     | 0.00                  | 10.70               |

**Table S3c.** Classification accuracy of image classification obtained by Sentinel-2 image acquired on 2022/03/30.

| <b>Class</b>   | <b>Producer Acc. (%)</b> | <b>User Acc. (%)</b> |
|----------------|--------------------------|----------------------|
| Snow           | 100.00                   | 99.78                |
| Shadow on Snow | 100.00                   | 100.00               |
| Freshwater     | 89.30                    | 100.00               |

**Table S4a.** Confusion Matrix of image classification obtained by Sentinel-2 image acquired on 2022/04/08.

| <b>Class</b>   | <b>Snow</b> | <b>Shadow on Snow</b> | <b>Freshwater</b> | <b>Total</b> |
|----------------|-------------|-----------------------|-------------------|--------------|
| Unclassified   | 0.00        | 0.00                  | 22.06             | 1.35         |
| Snow           | 100.00      | 0.00                  | 0.00              | 46.75        |
| Shadow on Snow | 0.00        | 100.00                | 0.00              | 47.11        |
| Freshwater     | 0.00        | 0.00                  | 77.94             | 4.78         |
| Total          | 100.00      | 100.00                | 100.00            | 100.00       |

**Table S4b.** Classification errors of image classification obtained by Sentinel-2 image acquired on 2022/04/08.

| <b>Class</b>   | <b>Commission (%)</b> | <b>Omission (%)</b> |
|----------------|-----------------------|---------------------|
| Snow           | 0.00                  | 0.00                |
| Shadow on Snow | 0.00                  | 0.00                |
| Freshwater     | 0.00                  | 22.06               |

**Table S4c.** Classification accuracy of image classification obtained by Sentinel-2 image acquired on 2022/04/08.

| <b>Class</b>   | <b>Producer Acc. (%)</b> | <b>User Acc. (%)</b> |
|----------------|--------------------------|----------------------|
| Snow           | 100.00                   | 100.00               |
| Shadow on Snow | 100.00                   | 100.00               |
| Freshwater     | 77.94                    | 100.00               |

**Table S5a.** Confusion Matrix of image classification obtained by Sentinel-2 image acquired on 2022/04/11.

| <b>Class</b>   | <b>Snow</b> | <b>Shadow on Snow</b> | <b>Freshwater</b> | <b>Total</b> |
|----------------|-------------|-----------------------|-------------------|--------------|
| Unclassified   | 0.00        | 0.00                  | 0.00              | 0.00         |
| Snow           | 100.00      | 0.60                  | 0.00              | 38.23        |
| Shadow on Snow | 0.00        | 99.40                 | 0.00              | 34.02        |
| Freshwater     | 0.00        | 0.00                  | 100.00            | 27.75        |
| Total          | 100.00      | 100.00                | 100.00            | 100.00       |

**Table S5b.** Classification errors of image classification obtained by Sentinel-2 image acquired on 2022/04/11.

| <b>Class</b>   | <b>Commission (%)</b> | <b>Omission (%)</b> |
|----------------|-----------------------|---------------------|
| Snow           | 0.54                  | 0.00                |
| Shadow on Snow | 0.00                  | 0.60                |
| Freshwater     | 0.00                  | 0.00                |

**Table S5c.** Classification accuracy of image classification obtained by Sentinel-2 image acquired on 2022/04/11.

| <b>Class</b>   | <b>Producer Acc. (%)</b> | <b>User Acc. (%)</b> |
|----------------|--------------------------|----------------------|
| Snow           | 100.00                   | 99.46                |
| Shadow on Snow | 100.00                   | 100.00               |
| Freshwater     | 99.40                    | 100.00               |

**Table S6a.** Confusion Matrix of image classification obtained by Sentinel-2 image acquired on 2022/05/11.

| <b>Class</b> | <b>Snow</b> | <b>Freshwater</b> | <b>Total</b> |
|--------------|-------------|-------------------|--------------|
| Unclassified | 0.00        | 0.00              | 0.00         |
| Snow         | 100.00      | 0.00              | 68.10        |
| Freshwater   | 0.00        | 100.00            | 31.90        |
| Total        | 100.00      | 100.00            | 100.00       |

**Table S6b.** Classification errors of image classification obtained by Sentinel-2 image acquired on 2022/05/11.

| <b>Class</b> | <b>Commission (%)</b> | <b>Omission (%)</b> |
|--------------|-----------------------|---------------------|
| Snow         | 0.00                  | 0.00                |
| Freshwater   | 0.00                  | 0.00                |

**Table S6c.** Classification accuracy of image classification obtained by Sentinel-2 image acquired on 2022/05/11.

| <b>Class</b> | <b>Producer Acc. (%)</b> | <b>User Acc. (%)</b> |
|--------------|--------------------------|----------------------|
| Snow         | 100.00                   | 100.00               |
| Freshwater   | 100.00                   | 100.00               |

**Table S7a.** Confusion Matrix of image classification obtained by Sentinel-2 image acquired on 2022/05/29.

| <b>Class</b> | <b>Snow</b> | <b>Freshwater</b> | <b>Sediments</b> | <b>Snow-Free</b> | <b>Total</b> |
|--------------|-------------|-------------------|------------------|------------------|--------------|
| Unclassified | 0.00        | 0.00              | 0.00             | 14.19            | 3.64         |
| Snow         | 100.00      | 0.00              | 0.38             | 0.00             | 19.45        |
| Freshwater   | 0.00        | 95.75.00          | 3.01             | 0.00             | 30.73        |
| Sediments    | 0.00        | 4.25              | 96.62            | 0.00             | 24.16        |
| Snow-Free    | 0.00        | 0.00              | 0.00             | 85.81            | 22.02        |
| Total        | 100.00      | 100.00            | 100.00           | 100.00           | 100.00       |

**Table S7b.** Classification errors of image classification obtained by Sentinel-2 image acquired on 2022/05/29.

| <b>Class</b> | <b>Commission (%)</b> | <b>Omission (%)</b> |
|--------------|-----------------------|---------------------|
| Snow         | 0.46                  | 0.00                |
| Freshwater   | 2.31                  | 4.25                |
| Sediments    | 5.51                  | 3.38                |
| Snow-Free    | 0.00                  | 14.19               |

**Table S7c.** Classification accuracy of image classification obtained by Sentinel-2 image acquired on 2022/05/29.

| <b>Class</b> | <b>Producer Acc. (%)</b> | <b>User Acc. (%)</b> |
|--------------|--------------------------|----------------------|
| Snow         | 100.00                   | 99.54                |
| Freshwater   | 85.81                    | 97.69                |
| Sediments    | 96.62                    | 94.49                |
| Snow-Free    | 95.75                    | 100.00               |

**Table S8a.** Confusion Matrix of image classification obtained by Sentinel-2 image acquired on 2022/06/02.

| <b>Class</b> | <b>Snow</b> | <b>Freshwater</b> | <b>Sediments</b> | <b>Snow-Free</b> | <b>Total</b> |
|--------------|-------------|-------------------|------------------|------------------|--------------|
| Unclassified | 0.00        | 0.00              | 0.00             | 0.00             | 0.00         |
| Snow         | 99.49       | 1.18              | 0.00             | 0.00             | 27.85        |
| Freshwater   | 0.51        | 97.65             | 2.63             | 0.00             | 24.05        |
| Sediments    | 0.00        | 1.18              | 97.37            | 0.00             | 21.10        |
| Snow-Free    | 0.00        | 0.00              | 0.00             | 100.00           | 27.00        |
| Total        | 100.00      | 100.00            | 100.00           | 100.00           | 100.00       |

**Table S8b.** Classification errors of image classification obtained by Sentinel-2 image acquired on 2022/06/02.

| <b>Class</b> | <b>Commission (%)</b> | <b>Omission (%)</b> |
|--------------|-----------------------|---------------------|
| Snow         | 1.01                  | 0.51                |
| Freshwater   | 2.92                  | 2.35                |
| Sediments    | 1.33                  | 2.63                |
| Snow-Free    | 0.00                  | 0.00                |

**Table S8c.** Classification accuracy of image classification obtained by Sentinel-2 image acquired on 2022/06/02.

| <b>Class</b> | <b>Producer Acc. (%)</b> | <b>User Acc. (%)</b> |
|--------------|--------------------------|----------------------|
| Snow         | 97.37                    | 98.67                |
| Freshwater   | 97.65                    | 97.08                |
| Sediments    | 97.37                    | 98.67                |
| Snow-Free    | 100.00                   | 100.00               |

**Table S9a.** Confusion Matrix of image classification obtained by Sentinel-2 image acquired on 2022/06/25.

| <b>Class</b> | <b>Snow</b> | <b>Freshwater</b> | <b>Sediments</b> | <b>Snow-Free</b> | <b>Total</b> |
|--------------|-------------|-------------------|------------------|------------------|--------------|
| Unclassified | 0.00        | 0.00              | 0.00             | 0.00             | 0.00         |
| Snow         | 84.62       | 0.00              | 0.00             | 0.00             | 20.07        |
| Freshwater   | 0.00        | 100.00            | 0.00             | 0.00             | 30.29        |
| Sediments    | 0.00        | 1.18              | 100.00           | 10.00            | 42.70        |
| Snow-Free    | 15.38       | 0.00              | 0.00             | 90.00            | 6.93         |
| Total        | 100.00      | 100.00            | 100.00           | 100.00           | 100.00       |

**Table S9b.** Classification errors of image classification obtained by Sentinel-2 image acquired on 2022/06/25.

| <b>Class</b> | <b>Commission (%)</b> | <b>Omission (%)</b> |
|--------------|-----------------------|---------------------|
| Snow         | 0.00                  | 15.38               |
| Freshwater   | 0.00                  | 0.00                |
| Sediments    | 0.85                  | 0.00                |
| Snow-Free    | 52.63                 | 10.00               |

**Table S9c.** Classification accuracy of image classification obtained by Sentinel-2 image acquired on 2022/06/25.

| <b>Class</b> | <b>Producer Acc. (%)</b> | <b>User Acc. (%)</b> |
|--------------|--------------------------|----------------------|
| Snow         | 84.62                    | 100.00               |
| Freshwater   | 100.00                   | 100.00               |
| Sediments    | 100.00                   | 99.15                |
| Snow-Free    | 90.00                    | 47.37                |

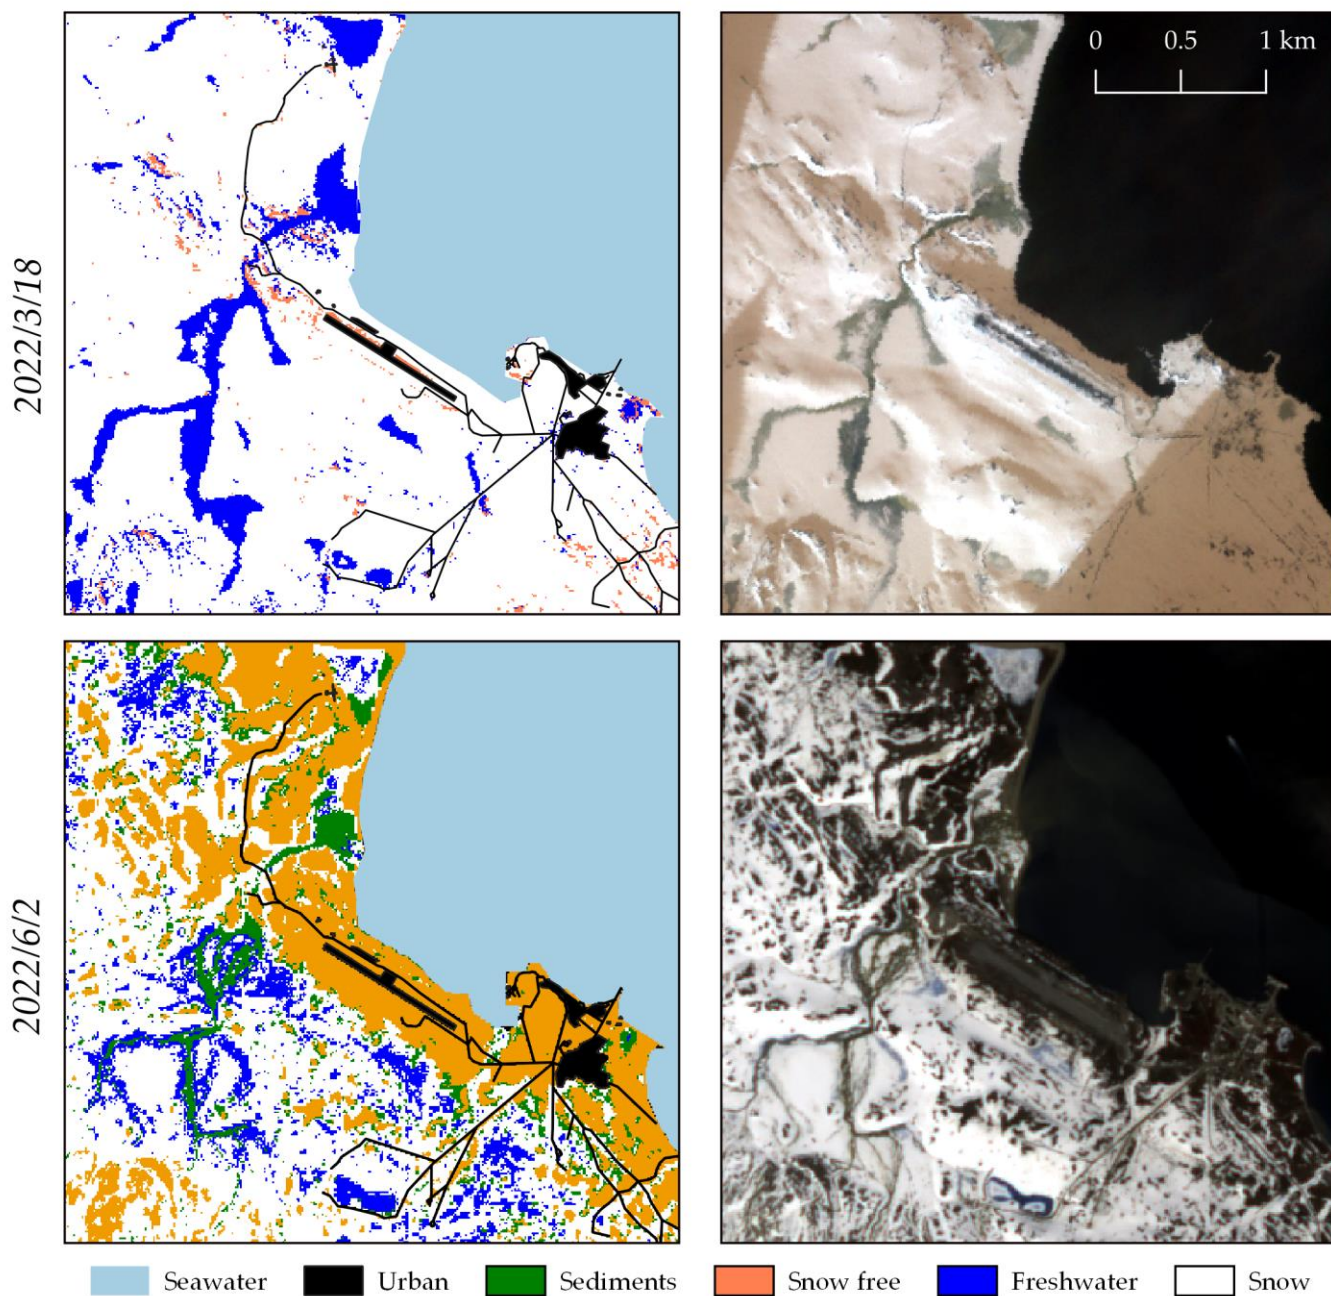

**Figure S1.** Comparison between the RGB visualizations and classifications of two Sentinel-2 images acquired respectively in March (a) and June (b) 2022.
